# Supplementary material
Source: Springer Nature journal article supplement (https://www.springermedizin.de/resource/supplementary/12937_2011_442_MOESM1_ESM.pdf/25653116)

### Gender

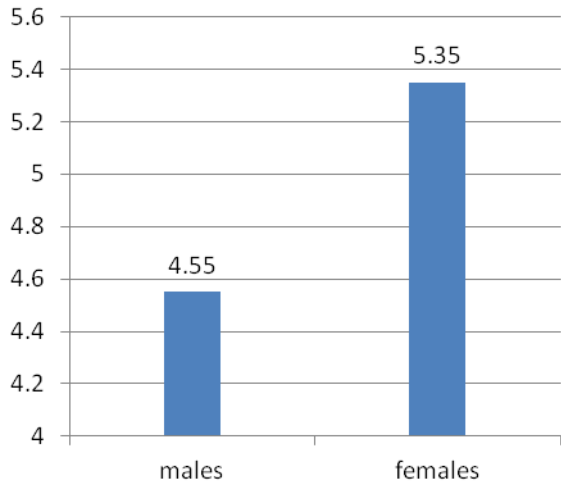

### Education Level

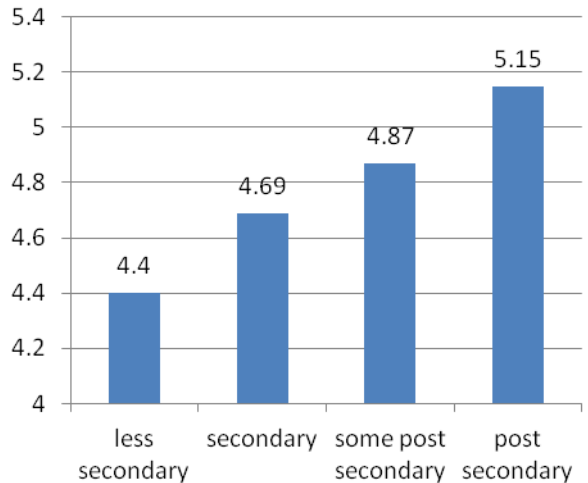

### Income level

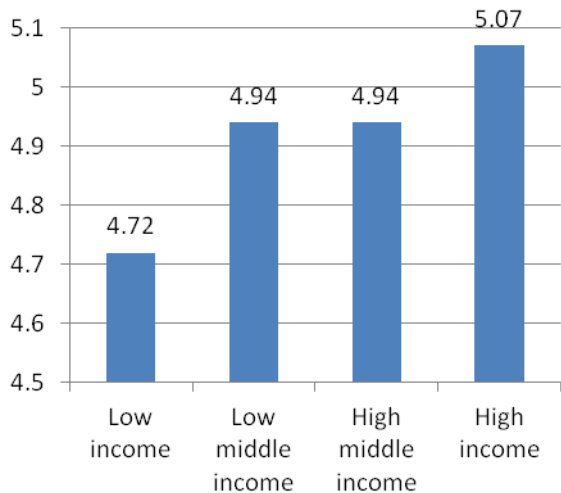

### Smoking status

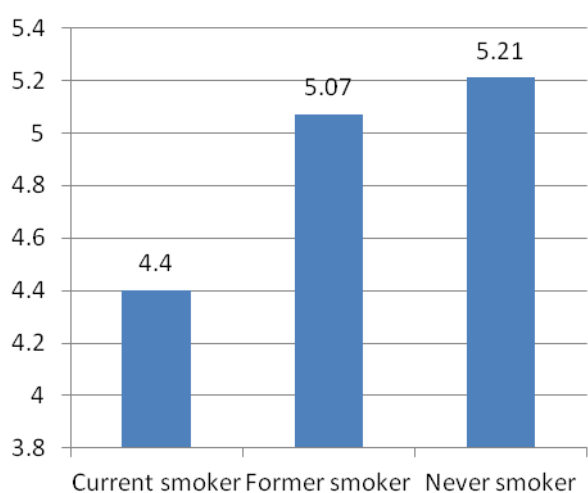

Supplement: MOESM1 [file 25653116]
